# Supplementary material for: Psychotherapy versus treatment as usual and other control interventions in children and adolescents with overweight and obesity: a protocol for systematic review with meta-analysis and Trial Sequential Analysis
Source: HighWire-hosted journal article supplement (doi:10.1136/bmjopen-2019-036058), 2020-11-01
Supplement: bmjopen-2019-036058supp002_data_supplement.pdf [file bmjopen-2019-036058supp002_data_supplement.pdf]

**Additional File 2**

NOTES: unless stated otherwise, search terms are free text terms; MeSH: Medical subject heading (Medline medical index term); an asterisk (\*) stands for 'any character(s)', a question mark stands for 'one or no character'.

1. exp Obesity/
2. exp Hyperphagia/
3. exp body mass index/
4. exp Weight Gain/
5. exp Weight Loss/
6. exp Anti-Obesity Agents/
7. (Pickwick\* syndrom\* or Prader willi syndrom\* or obes\* or adipos\* or overweight\* or 'over weight\*' or overeat\* or 'over eat\*' or 'over feed\*' or overfeed\* or binge eating disorder\* or 'fat overload' syndrom\*).mp. or (weight and (gain or cycling or reduc\* or loss or losing or maint\* or decreas\* or watch\* or diet\* or control\*)).ti,ab. [mp=title, abstract, original title, name of substance word, subject heading word, keyword heading word, protocol supplementary concept word, rare disease supplementary concept word, unique identifier, synonyms]
8. 1 or 2 or 3 or 4 or 5 or 6 or 7
9. exp PSYCHOTHERAPY/
10. (psycho\* or counsel\* or depression or depressiv\* or balint or crisis intervention\* or assert\* near training or ((person or client) and cent\*) or psychodrama\* or psycho drama\* or paradoxic\* technic\* or rational emoti\* or role play\* or relax\* near train\* or socioenvironment\* or socio environment\* or sociotherap\* or transactional).mp. or behavior?r modific\*.ti,ab. [mp=title, abstract, original title, name of substance word, subject heading word, keyword heading word, protocol supplementary concept word, rare disease supplementary concept word, unique identifier, synonyms]
11. ((interpersonal or art or aversion or behavior?r or colo?r or cognitiv\* or dance or gestalt or music or milieu or nondirectiv\* or non directiv\* or problem solving or problemsolving or self control or selfcontrol or play or reality or socio or supportiv\*) and therap\*).ti,ab.
12. 9 or 10 or 11
13. 8 and 12
14. (random\* or blind\* or placebo\* or meta-analys\*).mp. [mp=title, abstract, original title, name of substance word, subject heading word, keyword heading word, protocol supplementary concept word, rare disease supplementary concept word, unique identifier, synonyms]
15. 13 and 14
16. limit 15 to (("all infant (birth to 23 months)" or "all child (0 to 18 years)" or "newborn infant (birth to 1 month)" or "infant (1 to 23 months)" or "preschool child (2 to 5 years)" or "child (6 to 12 years)" or "adolescent (13 to 18 years)" or "young adult (19 to 24 years)") and humans)
